# Supplementary material for: Monitoring of Superparamagnetic Particle Sizes in the Langevin Law Regime
Source: Hindawi journal article supplement (doi:10.1155/2019/6409210), 2019-11-19
Supplement: f1 [file 6409210.f1.pdf]

## Supplementary materials

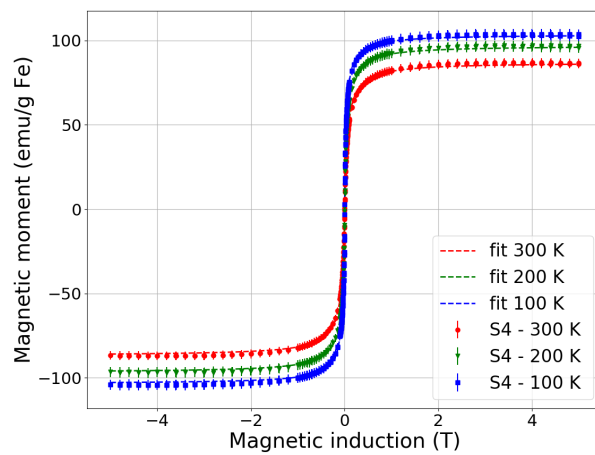

Figure S1: MB curves from -5 T to 5 T for S4 with lognormal distribution fitting.
